# Supplementary material for: Electro-acupuncture promotes survival, differentiation of the bone marrow mesenchymal stem cells as well as functional recovery in the spinal cord-transected rats
Source: PubMed Central journal article supplement (PMC2679038; doi:10.1186/1471-2202-10-35), 2009-04-20
Supplement: 1471-2202-10-35-S1.pdf [file 1471-2202-10-35-S1.pdf]

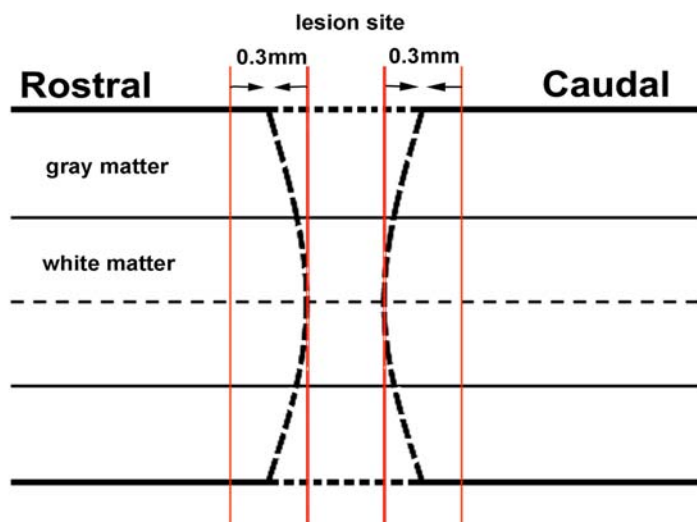

**A sketch of the injured spinal cord to clarify the location of quantification (rostral, caudal or the lesion site).**

The quantification of 5-HT positive fibers was performed at three regions (0.3mm rostral to the transection site, the transection site and 0.3mm caudal to the transection site) which were delineated by 4 red lines. The CGRP-positive fibers were quantified only in the lesion site (outlined by the two middle red lines) at 200 $\times$  magnification.
